# Supplementary material
Source: MDPI journal article supplement (https://www.mdpi.com/1424-2818/13/5/218)
Supplement: s1 [file s1]

**Table S1.** Pairwise distances calculated in *cytb* gene analysis (only values for *Hipposideros gentilis* and related species are shown).

|                                                          | 1     | 2     | 3     | 4     | 5     | 6     | 7     | 8     | 9     | 10    | 11    | 12    | 13    | 14    | 15    | 16    | 17    | 18    | 19    | 20    | 21    | 22    | 23    | 24    | 25    | 26    | 27    | 28    | 29    | 30    |
|----------------------------------------------------------|-------|-------|-------|-------|-------|-------|-------|-------|-------|-------|-------|-------|-------|-------|-------|-------|-------|-------|-------|-------|-------|-------|-------|-------|-------|-------|-------|-------|-------|-------|
| 1 DQ054808.1 <i>H.bicolor</i> Thailand Krabi             |       |       |       |       |       |       |       |       |       |       |       |       |       |       |       |       |       |       |       |       |       |       |       |       |       |       |       |       |       |       |
| 2 DQ054809.1 <i>H.cineraceus</i> Malaysia Pahang         | 0,069 |       |       |       |       |       |       |       |       |       |       |       |       |       |       |       |       |       |       |       |       |       |       |       |       |       |       |       |       |       |
| 3 DQ054810.1 <i>H.gentilis</i> Laos                      | 0,101 | 0,105 |       |       |       |       |       |       |       |       |       |       |       |       |       |       |       |       |       |       |       |       |       |       |       |       |       |       |       |       |
| 4 DQ054813.1 <i>H.rotalis</i> Laos Bolikhamxai           | 0,106 | 0,108 | 0,099 |       |       |       |       |       |       |       |       |       |       |       |       |       |       |       |       |       |       |       |       |       |       |       |       |       |       |       |
| 5 DQ054814.1 <i>H.rotalis</i> Laos                       | 0,106 | 0,106 | 0,097 | 0,011 |       |       |       |       |       |       |       |       |       |       |       |       |       |       |       |       |       |       |       |       |       |       |       |       |       |       |
| 6 DQ054815.1 <i>H.khaokhouayensis</i> Laos               | 0,094 | 0,104 | 0,094 | 0,040 | 0,038 |       |       |       |       |       |       |       |       |       |       |       |       |       |       |       |       |       |       |       |       |       |       |       |       |       |
| 7 DQ054816.1 <i>H.khaokhouayensis</i> Laos               | 0,102 | 0,111 | 0,093 | 0,044 | 0,040 | 0,004 |       |       |       |       |       |       |       |       |       |       |       |       |       |       |       |       |       |       |       |       |       |       |       |       |
| 8 DQ888671.1 <i>H.gentilis</i> China Yunnan              | 0,101 | 0,101 | 0,040 | 0,105 | 0,102 | 0,098 | 0,099 |       |       |       |       |       |       |       |       |       |       |       |       |       |       |       |       |       |       |       |       |       |       |       |
| 9 EU434947.1 <i>H.sp.</i> China Yunnan                   | 0,097 | 0,091 | 0,084 | 0,100 | 0,099 | 0,096 | 0,094 | 0,085 |       |       |       |       |       |       |       |       |       |       |       |       |       |       |       |       |       |       |       |       |       |       |
| 10 EU434950.1 <i>H.gentilis</i> China Guangdong          | 0,093 | 0,103 | 0,078 | 0,098 | 0,095 | 0,096 | 0,096 | 0,077 | 0,089 |       |       |       |       |       |       |       |       |       |       |       |       |       |       |       |       |       |       |       |       |       |
| 11 KJ619513.1 <i>H.gentilis</i> China Guangdong          | 0,094 | 0,103 | 0,080 | 0,098 | 0,097 | 0,096 | 0,097 | 0,077 | 0,089 | 0,001 |       |       |       |       |       |       |       |       |       |       |       |       |       |       |       |       |       |       |       |       |
| 12 KJ623703.1 <i>H.gentilis</i> China Hainan             | 0,103 | 0,104 | 0,041 | 0,105 | 0,103 | 0,099 | 0,098 | 0,002 | 0,087 | 0,080 | 0,079 |       |       |       |       |       |       |       |       |       |       |       |       |       |       |       |       |       |       |       |
| 13 KJ623704.1 <i>H.gentilis</i> China Hainan             | 0,104 | 0,105 | 0,042 | 0,105 | 0,104 | 0,100 | 0,099 | 0,003 | 0,088 | 0,080 | 0,080 | 0,001 |       |       |       |       |       |       |       |       |       |       |       |       |       |       |       |       |       |       |
| 14 KJ623705.1 <i>H.gentilis</i> China Yunnan             | 0,097 | 0,101 | 0,069 | 0,099 | 0,097 | 0,094 | 0,095 | 0,072 | 0,089 | 0,058 | 0,057 | 0,072 | 0,073 |       |       |       |       |       |       |       |       |       |       |       |       |       |       |       |       |       |
| 15 KP336273.1 <i>H.gentilis</i> China Yunnan             | 0,094 | 0,100 | 0,070 | 0,098 | 0,097 | 0,092 | 0,094 | 0,077 | 0,090 | 0,057 | 0,056 | 0,077 | 0,078 | 0,008 |       |       |       |       |       |       |       |       |       |       |       |       |       |       |       |       |
| 16 KP336274.1 <i>H.gentilis</i> China Yunnan             | 0,095 | 0,102 | 0,069 | 0,097 | 0,097 | 0,091 | 0,094 | 0,078 | 0,092 | 0,059 | 0,058 | 0,078 | 0,079 | 0,010 | 0,002 |       |       |       |       |       |       |       |       |       |       |       |       |       |       |       |
| 17 KP876550.1 <i>H.gentilis</i> China                    | 0,098 | 0,097 | 0,077 | 0,105 | 0,100 | 0,096 | 0,098 | 0,076 | 0,090 | 0,066 | 0,064 | 0,077 | 0,078 | 0,044 | 0,043 | 0,044 |       |       |       |       |       |       |       |       |       |       |       |       |       |       |
| 18 KX467584.1 <i>H.cineraceus</i> China                  | 0,097 | 0,095 | 0,093 | 0,109 | 0,107 | 0,102 | 0,102 | 0,095 | 0,025 | 0,095 | 0,095 | 0,096 | 0,096 | 0,095 | 0,093 | 0,095 | 0,093 |       |       |       |       |       |       |       |       |       |       |       |       |       |
| 19 LC406452.1 <i>H.cineraceus</i> C. Vietnam Quang Tri   | 0,093 | 0,092 | 0,086 | 0,101 | 0,099 | 0,094 | 0,094 | 0,088 | 0,020 | 0,091 | 0,092 | 0,089 | 0,090 | 0,087 | 0,086 | 0,088 | 0,089 | 0,020 |       |       |       |       |       |       |       |       |       |       |       |       |
| 20 LC406453.1 <i>H.cineraceus</i> C. Vietnam Quang Tri   | 0,092 | 0,093 | 0,085 | 0,100 | 0,098 | 0,093 | 0,095 | 0,087 | 0,021 | 0,091 | 0,091 | 0,088 | 0,089 | 0,086 | 0,085 | 0,087 | 0,090 | 0,021 | 0,001 |       |       |       |       |       |       |       |       |       |       |       |
| 21 LC406454.1 <i>H.cineraceus</i> C. Vietnam Quang Tri   | 0,096 | 0,093 | 0,087 | 0,102 | 0,099 | 0,095 | 0,095 | 0,089 | 0,019 | 0,092 | 0,093 | 0,090 | 0,091 | 0,088 | 0,087 | 0,088 | 0,090 | 0,021 | 0,003 | 0,004 |       |       |       |       |       |       |       |       |       |       |
| 22 LC406456.1 <i>H.cineraceus</i> N. Vietnam Tuyen Quang | 0,095 | 0,094 | 0,087 | 0,106 | 0,103 | 0,101 | 0,099 | 0,089 | 0,023 | 0,091 | 0,091 | 0,090 | 0,091 | 0,091 | 0,090 | 0,092 | 0,090 | 0,002 | 0,019 | 0,020 | 0,020 |       |       |       |       |       |       |       |       |       |
| 23 MK064112.1 <i>H.gentilis</i> Myanmar Sagaing          | 0,090 | 0,099 | 0,073 | 0,100 | 0,098 | 0,094 | 0,096 | 0,077 | 0,090 | 0,057 | 0,057 | 0,078 | 0,079 | 0,021 | 0,017 | 0,019 | 0,037 | 0,091 | 0,089 | 0,088 | 0,090 | 0,088 |       |       |       |       |       |       |       |       |
| 24 MK064113.1 <i>H.gentilis</i> Myanmar Naypyidaw        | 0,098 | 0,106 | 0,075 | 0,107 | 0,103 | 0,099 | 0,101 | 0,077 | 0,091 | 0,062 | 0,062 | 0,080 | 0,080 | 0,027 | 0,022 | 0,024 | 0,044 | 0,095 | 0,091 | 0,090 | 0,091 | 0,091 | 0,018 |       |       |       |       |       |       |       |
| 25 MK091936.1 <i>H.cineraceus</i> N. Vietnam Phu Tho     | 0,098 | 0,091 | 0,083 | 0,101 | 0,100 | 0,095 | 0,093 | 0,084 | 0,001 | 0,090 | 0,090 | 0,086 | 0,087 | 0,090 | 0,089 | 0,091 | 0,091 | 0,024 | 0,019 | 0,020 | 0,018 | 0,022 | 0,091 | 0,091 |       |       |       |       |       |       |
| 26 MK091940.1 <i>H.gentilis</i> N. Vietnam Ha Giang      | 0,093 | 0,103 | 0,080 | 0,099 | 0,097 | 0,097 | 0,098 | 0,077 | 0,087 | 0,002 | 0,001 | 0,080 | 0,080 | 0,058 | 0,057 | 0,059 | 0,066 | 0,093 | 0,090 | 0,089 | 0,091 | 0,089 | 0,057 | 0,062 | 0,088 |       |       |       |       |       |
| 27 MK091943.1 <i>H.gentilis</i> C. Vietnam Quang Tri     | 0,093 | 0,102 | 0,026 | 0,105 | 0,102 | 0,098 | 0,096 | 0,042 | 0,085 | 0,077 | 0,077 | 0,043 | 0,044 | 0,069 | 0,070 | 0,071 | 0,072 | 0,090 | 0,085 | 0,086 | 0,086 | 0,085 | 0,066 | 0,069 | 0,084 | 0,077 |       |       |       |       |
| 28 MK091946.1 <i>H.gentilis</i> N. Vietnam Tuyen Quang   | 0,092 | 0,104 | 0,081 | 0,100 | 0,098 | 0,096 | 0,097 | 0,077 | 0,088 | 0,003 | 0,002 | 0,080 | 0,081 | 0,059 | 0,058 | 0,060 | 0,067 | 0,094 | 0,091 | 0,090 | 0,091 | 0,090 | 0,058 | 0,062 | 0,089 | 0,001 | 0,076 |       |       |       |
| 29 MK091947.1 <i>H.gentilis</i> N. Vietnam Phu Tho       | 0,097 | 0,105 | 0,082 | 0,101 | 0,099 | 0,099 | 0,099 | 0,080 | 0,091 | 0,007 | 0,006 | 0,083 | 0,084 | 0,058 | 0,057 | 0,059 | 0,066 | 0,097 | 0,093 | 0,092 | 0,094 | 0,092 | 0,057 | 0,062 | 0,091 | 0,005 | 0,078 | 0,006 |       |       |
| 30 MK091949.1 <i>H.gentilis</i> N. Vietnam Phu Tho       | 0,098 | 0,106 | 0,083 | 0,102 | 0,099 | 0,100 | 0,100 | 0,079 | 0,090 | 0,008 | 0,007 | 0,082 | 0,083 | 0,059 | 0,058 | 0,060 | 0,067 | 0,096 | 0,092 | 0,091 | 0,093 | 0,091 | 0,058 | 0,062 | 0,091 | 0,006 | 0,079 | 0,007 | 0,001 |       |
| 31 MK410336.1 <i>H.gentilis</i> Myanmar Sagaing          | 0,089 | 0,098 | 0,074 | 0,101 | 0,099 | 0,094 | 0,097 | 0,077 | 0,091 | 0,058 | 0,058 | 0,079 | 0,080 | 0,022 | 0,018 | 0,020 | 0,035 | 0,092 | 0,090 | 0,089 | 0,091 | 0,089 | 0,003 | 0,019 | 0,091 | 0,058 | 0,067 | 0,059 | 0,058 | 0,059 |
| 32 MK410337.1 <i>H.gentilis</i> Myanmar                  | 0,089 | 0,098 | 0,072 | 0,099 | 0,097 | 0,093 | 0,095 | 0,076 | 0,089 | 0,056 | 0,056 | 0,077 | 0,078 | 0,021 | 0,016 | 0,018 | 0,036 | 0,090 | 0,088 | 0,087 | 0,089 | 0,087 | 0,001 | 0,018 | 0,090 | 0,056 | 0,065 | 0,057 | 0,056 | 0,057 |
| 33 MK410340.1 <i>H.gentilis</i> Myanmar Sagaing          | 0,089 | 0,098 | 0,072 | 0,099 | 0,097 | 0,094 | 0,095 | 0,076 | 0,089 | 0,058 | 0,058 | 0,077 | 0,078 | 0,022 | 0,018 | 0,020 | 0,036 | 0,091 | 0,088 | 0,087 | 0,089 | 0,087 | 0,003 | 0,019 | 0,090 | 0,058 | 0,065 | 0,059 | 0,058 | 0,059 |
| 34 MK410344.1 <i>H.gentilis</i> N. Vietnam Ninh Binh     | 0,092 | 0,104 | 0,077 | 0,097 | 0,094 | 0,095 | 0,095 | 0,074 | 0,088 | 0,008 | 0,007 | 0,077 | 0,078 | 0,055 | 0,055 | 0,056 | 0,063 | 0,094 | 0,091 | 0,090 | 0,091 | 0,090 | 0,055 | 0,059 | 0,089 | 0,008 | 0,076 | 0,009 | 0,010 | 0,011 |
| 35 MK410350.1 <i>H.gentilis</i> S. Vietnam Binh Thuan    | 0,093 | 0,100 | 0,093 | 0,076 | 0,073 | 0,071 | 0,075 | 0,091 | 0,090 | 0,087 | 0,088 | 0,093 | 0,094 | 0,097 | 0,095 | 0,095 | 0,093 | 0,097 | 0,090 | 0,089 | 0,091 | 0,092 | 0,093 | 0,099 | 0,089 | 0,085 | 0,091 | 0,086 | 0,091 | 0,091 |
| 36 MK410351.1 <i>H.gentilis</i> S. Vietnam Binh Thuan    | 0,094 | 0,105 | 0,096 | 0,077 | 0,076 | 0,072 | 0,077 | 0,095 | 0,093 | 0,088 | 0,088 | 0,095 | 0,096 | 0,097 | 0,092 | 0,090 | 0,094 | 0,098 | 0,091 | 0,091 | 0,092 | 0,094 | 0,091 | 0,098 | 0,092 | 0,088 | 0,095 | 0,089 | 0,093 | 0,094 |
| 37 MK410352.1 <i>H.cineraceus</i> N. Vietnam Vinh Phuc   | 0,095 | 0,094 | 0,087 | 0,106 | 0,103 | 0,101 | 0,099 | 0,089 | 0,023 | 0,091 | 0,091 | 0,090 | 0,091 | 0,091 | 0,090 | 0,092 | 0,090 | 0,001 | 0,018 | 0,019 | 0,019 | 0,001 | 0,088 | 0,091 | 0,022 | 0,089 | 0,085 | 0,090 | 0,092 | 0,091 |
| 38 MK430028.1 <i>H.gentilis</i> S. Vietnam Binh Thuan    | 0,095 | 0,104 | 0,095 | 0,076 | 0,075 | 0,071 | 0,077 | 0,094 | 0,092 | 0,089 | 0,089 | 0,094 | 0,095 | 0,096 | 0,091 | 0,089 | 0,093 | 0,097 | 0,091 | 0,090 | 0,091 | 0,093 | 0,090 | 0,097 | 0,109 | 0,099 | 0,103 | 0,100 | 0,104 | 0,106 |
| 39 MK430029.1 <i>H.gentilis</i> N. Vietnam Vinh Phuc     | 0,090 | 0,101 | 0,077 | 0,096 | 0,093 | 0,093 | 0,094 | 0,073 | 0,085 | 0,007 | 0,006 | 0,076 | 0,077 | 0,054 | 0,053 | 0,055 | 0,060 | 0,091 | 0,088 | 0,087 | 0,089 | 0,087 | 0,053 | 0,057 | 0,086 | 0,007 | 0,075 | 0,008 | 0,009 | 0,010 |
| 40 MK462234.1 <i>H.gentilis</i> Myanmar Sagaing          | 0,090 | 0,099 | 0,071 | 0,099 | 0,098 | 0,092 | 0,094 | 0,075 | 0,090 | 0,057 | 0,057 | 0,076 | 0,077 | 0,021 | 0,017 | 0,019 | 0,037 | 0,091 | 0,089 | 0,088 | 0,090 | 0,088 | 0,002 | 0,018 | 0,091 | 0,057 | 0,064 | 0,058 | 0,057 | 0,058 |
| 41 MT149741.1 <i>H.bicolor</i> Malaysia                  | 0,045 | 0,066 | 0,102 | 0,108 | 0,109 | 0,108 | 0,113 | 0,100 | 0,098 | 0,103 | 0,103 | 0,102 | 0,103 | 0,100 | 0,100 | 0,100 | 0,103 | 0,101 | 0,096 | 0,095 | 0,097 | 0,100 | 0,097 | 0,109 | 0,099 | 0,103 | 0,100 | 0,104 | 0,107 | 0,106 |
| 42 MT149742.1 <i>H.bicolor</i> Malaysia                  | 0,042 | 0,067 | 0,104 | 0,109 | 0,111 | 0,105 | 0,113 | 0,102 | 0,100 | 0,105 | 0,104 | 0,103 | 0,104 | 0,099 | 0,099 | 0,099 | 0,104 | 0,103 | 0,098 | 0,097 | 0,099 | 0,102 | 0,097 | 0,109 | 0,101 | 0,105 | 0,100 | 0,106 | 0,109 | 0,108 |
| 43 MT149813.1 <i>H.cf.bicolor</i> Malaysia               | 0,090 | 0,072 | 0,108 | 0,112 | 0,116 | 0,108 | 0,112 | 0,106 | 0,090 | 0,106 | 0,104 | 0,106 | 0,107 | 0,101 | 0,101 | 0,102 | 0,091 | 0,101 | 0,091 | 0,092 | 0,092 | 0,100 | 0,099 | 0,105 | 0,091 | 0,106 | 0,107 | 0,107 | 0,109 | 0,108 |
| 44 S-167170 <i>H.gentilis</i> C. Vietnam Quan Binh       | 0,090 | 0,103 | 0,027 | 0,102 | 0,099 | 0,096 | 0,097 | 0,041 | 0,090 | 0,074 | 0,074 | 0,042 | 0,043 | 0,066 | 0,067 | 0,068 | 0,073 | 0,094 | 0,090 | 0,089 | 0,091 | 0,090 | 0,065 | 0,069 | 0,089 | 0,074 | 0,013 | 0,073 | 0,074 | 0,075 |
| 45 S-167172 <i>H.gentilis</i> C. Vietnam Quan Binh       | 0,089 | 0,102 | 0,026 | 0,101 | 0,099 | 0,095 | 0,096 | 0,040 | 0,089 |       |       |       |       |       |       |       |       |       |       |       |       |       |       |       |       |       |       |       |       |       |

|    |            |                    |     |         |           |       |       |       |       |       |       |       |       |       |       |       |       |       |       |       |       |       |       |       |       |       |       |       |       |       |       |       |       |       |       |
|----|------------|--------------------|-----|---------|-----------|-------|-------|-------|-------|-------|-------|-------|-------|-------|-------|-------|-------|-------|-------|-------|-------|-------|-------|-------|-------|-------|-------|-------|-------|-------|-------|-------|-------|-------|-------|
| 54 | S-191870   | <i>H. gentilis</i> | S.  | Vietnam | Dong Nai  | 0,084 | 0,084 | 0,098 | 0,076 | 0,073 | 0,087 | 0,093 | 0,104 | 0,093 | 0,107 | 0,107 | 0,107 | 0,110 | 0,092 | 0,092 | 0,092 | 0,096 | 0,093 | 0,090 | 0,090 | 0,090 | 0,090 | 0,087 | 0,096 | 0,096 | 0,104 | 0,098 | 0,104 | 0,110 | 0,112 |
| 55 | S-190302   | <i>H. gentilis</i> | S.  | Vietnam | Bihn Chau | 0,098 | 0,110 | 0,104 | 0,075 | 0,077 | 0,073 | 0,075 | 0,100 | 0,107 | 0,090 | 0,090 | 0,099 | 0,099 | 0,105 | 0,102 | 0,100 | 0,097 | 0,113 | 0,104 | 0,103 | 0,105 | 0,111 | 0,097 | 0,107 | 0,107 | 0,091 | 0,102 | 0,092 | 0,097 | 0,098 |
| 56 | S-198154   | <i>H. gentilis</i> | S-C | Vietnam | Gia Lai   | 0,107 | 0,103 | 0,102 | 0,067 | 0,069 | 0,070 | 0,094 | 0,098 | 0,095 | 0,095 | 0,095 | 0,097 | 0,095 | 0,100 | 0,098 | 0,097 | 0,099 | 0,097 | 0,099 | 0,099 | 0,099 | 0,097 | 0,099 | 0,098 | 0,097 | 0,101 | 0,095 | 0,098 | 0,097 |       |
| 57 | EU434948.1 | <i>H. sp.</i>      | I   | China   | Yunnan    | 0,095 | 0,094 | 0,087 | 0,106 | 0,103 | 0,101 | 0,099 | 0,089 | 0,023 | 0,091 | 0,091 | 0,090 | 0,091 | 0,091 | 0,090 | 0,092 | 0,090 | 0,001 | 0,018 | 0,019 | 0,019 | 0,001 | 0,088 | 0,091 | 0,022 | 0,089 | 0,085 | 0,090 | 0,092 | 0,091 |

**Table S1.** (continuation).

[illegible]

[illegible]

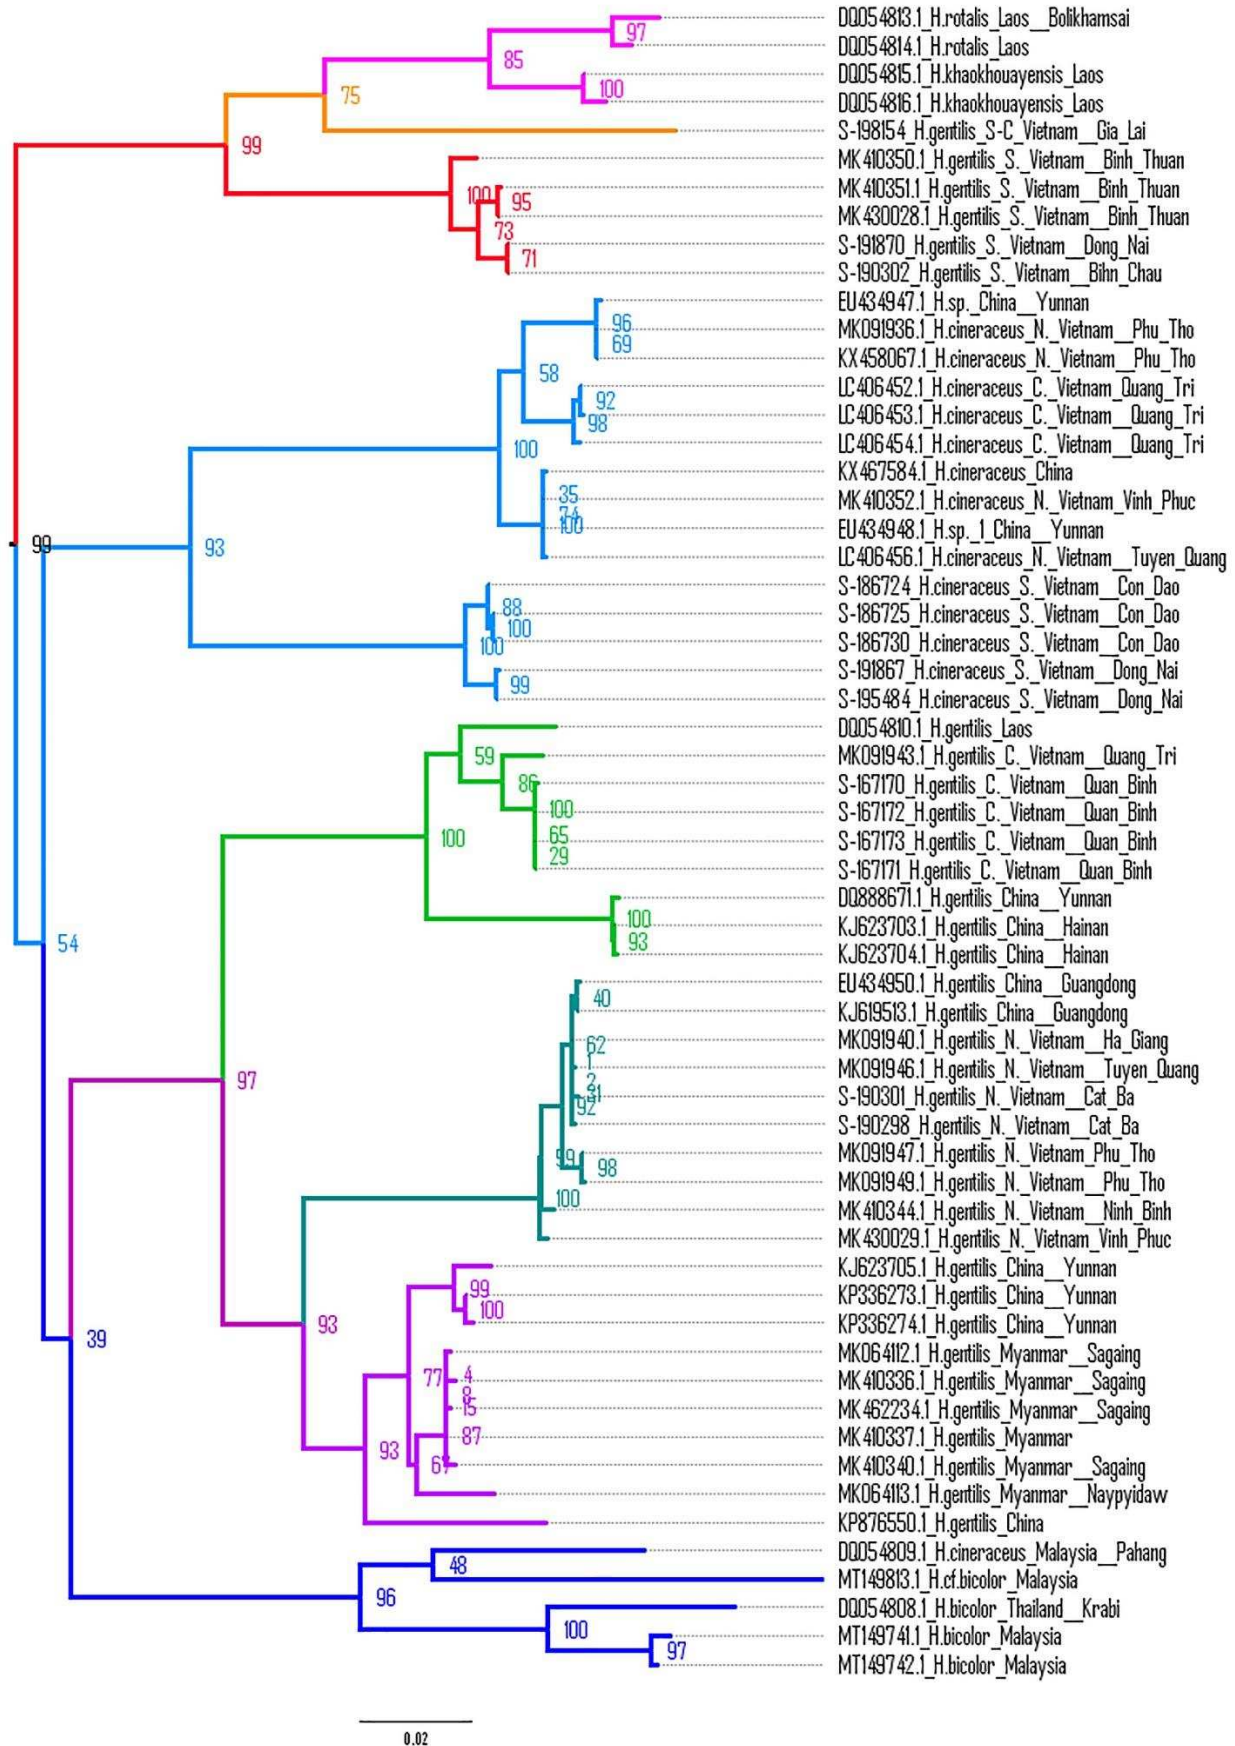

**Figure S1.** Phylogenetic relationships of selected *Hipposideros* species inferred from *cytb* sequences (unfolded Figure 2. Maximum likelihood supports are shown at the tree nodes.

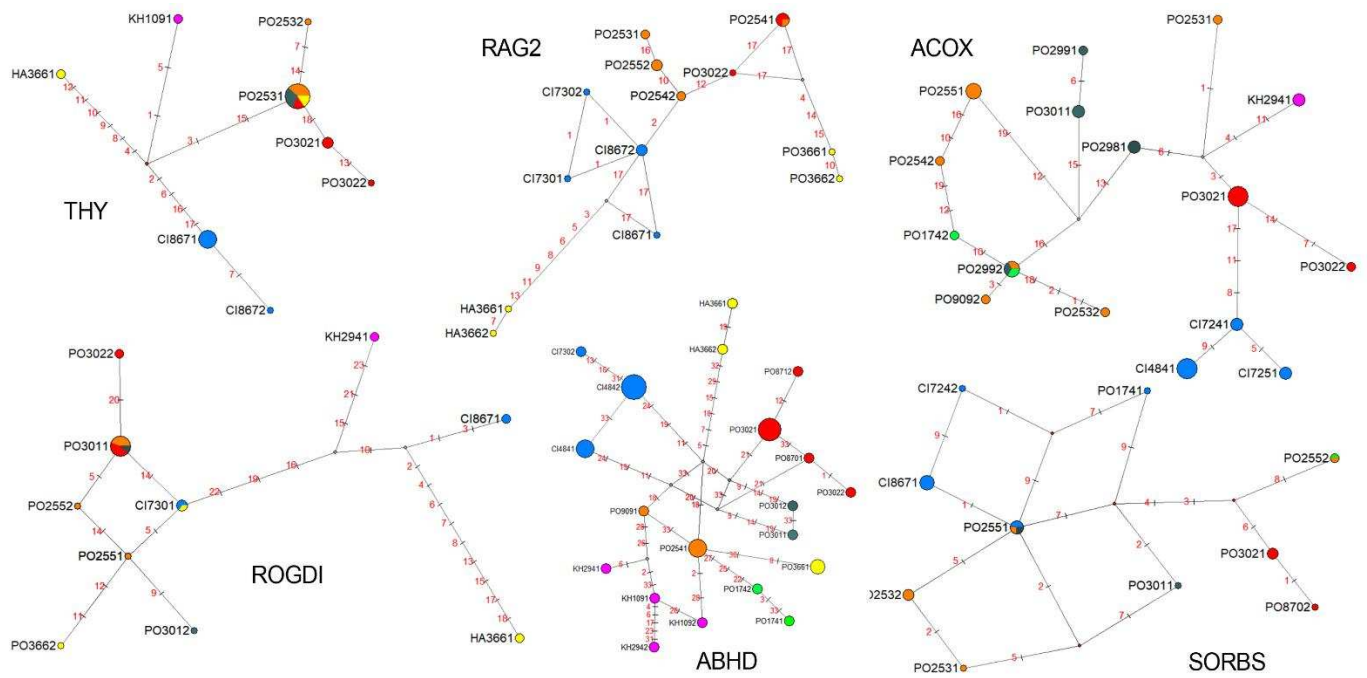

**Figure S2.** Median-joining networks showing the relationships among the alleles of the individual nuclear genes of *Hipposideros gentilis* and some related forms. Size of nodes designate allele count. Pie-charts are colored the same way as the branches of MRP tree (Figure 3); outgroups and uncertainly attributed GenBank sequences are colored in yellow. Mutated positions in variable character matrices are designated on edges. For specimen numbers and a full list of alleles in each node see Tables S2 and S3.

**Table S2.** Specimen IDs and haplotypes codes as they are designated on Figure S2.

| Specimen ID | Species                 | Allele1 | Allele2 |
|-------------|-------------------------|---------|---------|
| T-250608-2  | « <i>H. ater</i> »      | at1091  | at1092  |
| T-180809-3  | « <i>H. pomona</i> »    | po3661  | po3662  |
| S-167179    | <i>H. cineraceus</i>    | ci1791  | ci1792  |
| S-186724    | <i>H. cineraceus</i>    | ci7241  | ci7242  |
| S-186725    | <i>H. cineraceus</i>    | ci7251  | ci7252  |
| S-186730    | <i>H. cineraceus</i>    | ci7301  | ci7302  |
| S-191867    | <i>H. cineraceus</i>    | ci8671  | ci8672  |
| S-195484    | <i>H. cineraceus</i>    | ci4841  | ci4842  |
| Hhal2       | <i>H. halophyllus</i>   | ha3661  | ha3662  |
| S-190294    | <i>H. khaokhouensis</i> | kh2941  | kh2942  |
| T-070108-1  | <i>H. khaokhouensis</i> | kh1091  | kh1092  |
| S-167174    | <i>H. gentilis</i>      | po1741  | po1742  |
| S-190298    | <i>H. gentilis</i>      | po2981  | po2982  |
| S-190299    | <i>H. gentilis</i>      | po2991  | po2992  |
| S-190301    | <i>H. gentilis</i>      | po3011  | po3012  |
| S-190302    | <i>H. gentilis</i>      | po3021  | po3022  |
| S-191870    | <i>H. gentilis</i>      | po8701  | po8702  |
| S-191871    | <i>H. gentilis</i>      | po8711  | po8712  |
| S-191909    | <i>H. gentilis</i>      | po9091  | po9092  |
| S-198253    | <i>H. gentilis</i>      | po2531  | po2532  |
| S-198254    | <i>H. gentilis</i>      | po2541  | po2542  |
| S-198255    | <i>H. gentilis</i>      | po2551  | po2552  |

**Table S3.** Identical haplotypes lists for nodes on networks (Figure S2)  
 NN – network node name, AH – additional haplotypes.

[illegible]
